# Supplementary material for: A size-controlled green synthesis of silver nanoparticles by using the berry extract of Sea Buckthorn and their biological activities
Source: Royal Society of Chemistry journal article supplement (doi:10.1039/d0nj01335h), 2020-01-01
Supplement: d0nj01335h1.pdf [file d0nj01335h1.pdf]

## SUPPORTING INFORMATION FOR

### **A Size-Controlled Green Synthesis of Silver Nanoparticles by the Berry Extract of *Sea Buckthorn* and the Biological Activities**

Simin Wei<sup>‡,a</sup>, Yinghui Wang<sup>‡,b,\*</sup>, Zhishu Tang<sup>a,\*</sup>, Jinhang Hu<sup>a</sup>, Rui Su<sup>a</sup>,  
Jingjie Lin<sup>a</sup>, Tuan Zhou<sup>a</sup>, Hui Guo<sup>a</sup>, Nan Wang<sup>a</sup>, Rongrong Xu<sup>a</sup>

<sup>a</sup> Shaanxi Collaborative Innovation Center of Chinese Medicine Resources Industrialization, State Key Laboratory of Research & Development of Characteristic Qin Medicine Resources / Shaanxi Innovative Drug Research Center, Shaanxi University of Chinese Medicine, Xianyang 712083, China

<sup>b</sup> College of Science, Chang'an University, Xi'an 710064, China

<sup>‡</sup> These authors contributed equally to this work

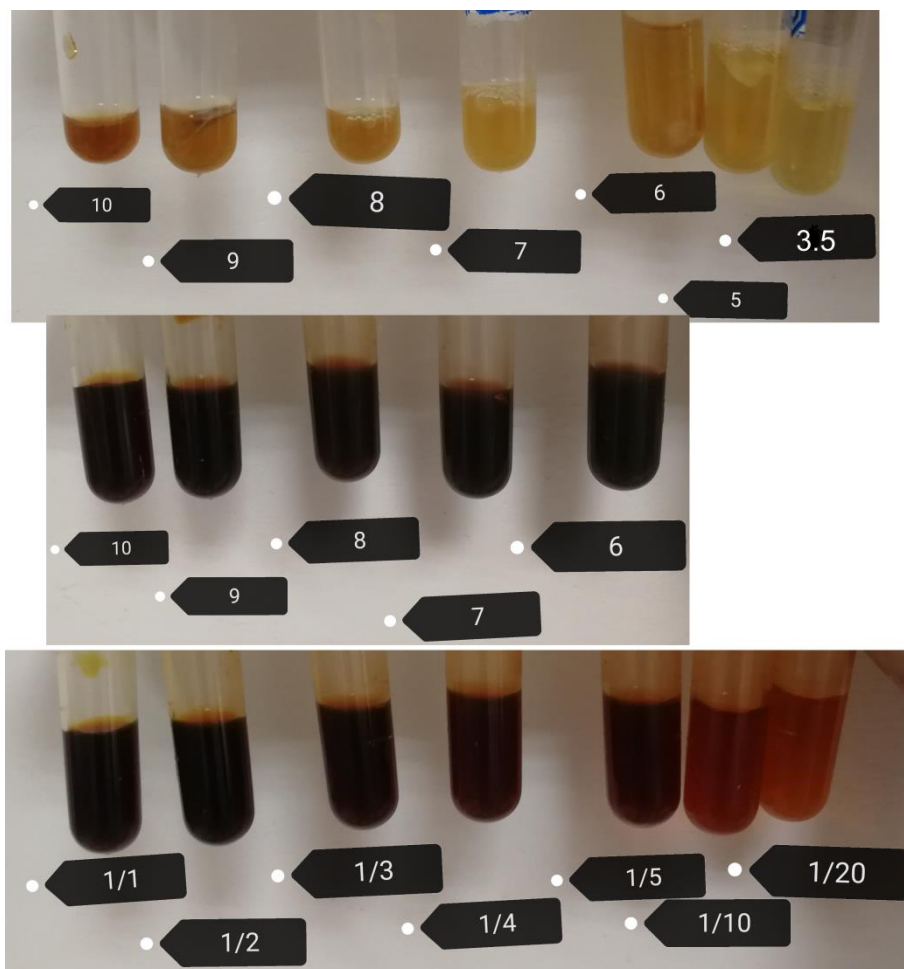

Figure S1 The photographs of (A) the SBT extract at different pH; (B) the mixture of SBT extract and AgNO<sub>3</sub> at different pH after 4 h reaction; (C) the mixture of SBT extract and AgNO<sub>3</sub> at different material proportion after 4 h reaction

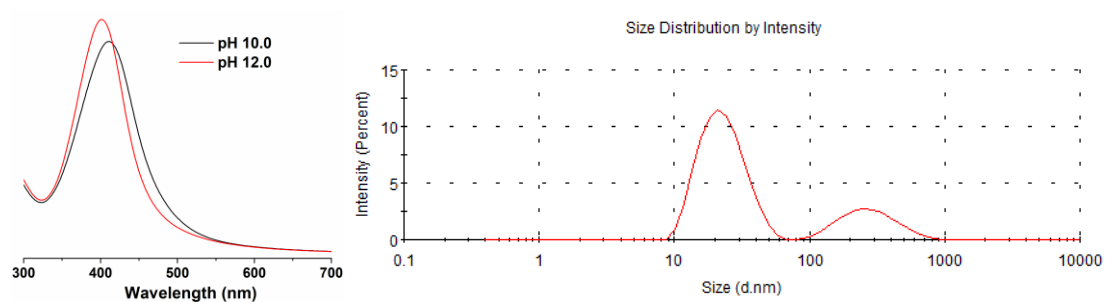

Figure S2 The UV (left) and size (right) of synthesized AgNPs at pH 12.0

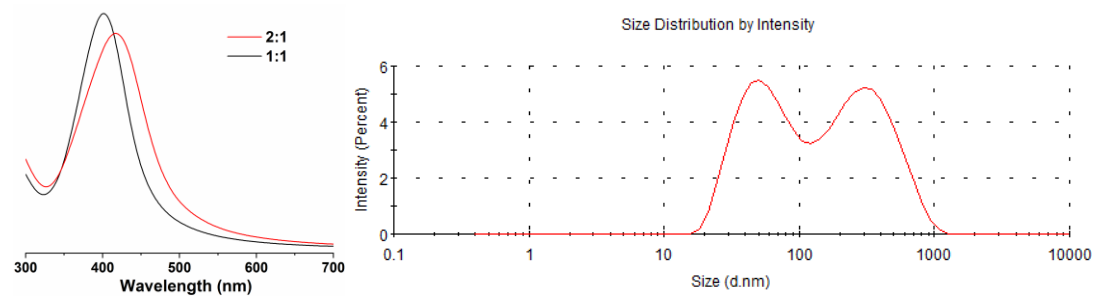

Figure S3 The UV (left) and size (right) of synthesized AgNPs at 2:1

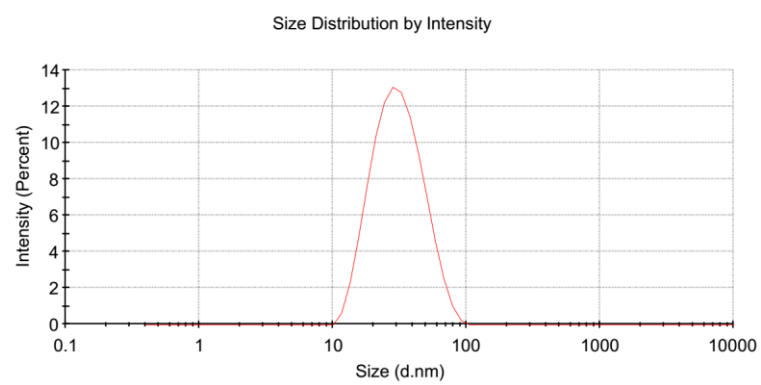

Figure S4 The size of synthesized AgNPs after 3 months

Table S1 The average size for synthesized AgNPs at different pH

| pH        | 5.0          | 6.0         | 7.0         | 8.0         | 9.0        | 10.0       |
|-----------|--------------|-------------|-------------|-------------|------------|------------|
| Size (nm) | 666.3 ± 15.7 | 154.3 ± 1.2 | 148.5 ± 1.0 | 135.9 ± 0.9 | 80.4 ± 0.4 | 27.3 ± 0.2 |

Table S2 The average size for synthesized AgNPs at different material proportion

| ratio     | 1:1        | 1:2        | 1:3        | 1:4        | 1:5         | 1:10        | 1:20        |
|-----------|------------|------------|------------|------------|-------------|-------------|-------------|
| Size (nm) | 27.3 ± 0.2 | 67.0 ± 0.1 | 82.8 ± 0.1 | 90.5 ± 0.6 | 100.9 ± 1.0 | 103.4 ± 0.9 | 106.6 ± 1.6 |

Table S3 The average size for synthesized AgNPs at different reaction times

| times(h)  | 1          | 2          | 3          | 4          |
|-----------|------------|------------|------------|------------|
| Size (nm) | 36.4 ± 0.6 | 33.2 ± 0.2 | 29.0 ± 0.2 | 27.3 ± 0.2 |
